# Supplementary material for: PERK induces resistance to cell death elicited by endoplasmic reticulum stress and chemotherapy
Source: Mol Cancer. 2017 May 12;16:91. doi: 10.1186/s12943-017-0657-0 (PMC5427528; doi:10.1186/s12943-017-0657-0)
Supplement: Supplementary file 1 — IC50 (μM) of chemotherapeutic agents and ER stress inducers in HT29 and HT29/MDR cells. Data are mean ± SD (n = 3). *p < 0.02 for HT29/MDR vs. HT29 cells. (XLSX 12 kb) [file 12943_2017_657_MOESM1_ESM.xlsx]

## Sheet: Foglio1
Drug	Transporter	HT29	HT29/MDR
doxorubicin	Pgp, MRP1, MRP2, MRP3, BCRP	6.12 + 0.11	12.73 + 0.24 *
vinblastine	Pgp, MRP1, MRP2	4.01 + 0.25	10.06 + 0.62 *
etoposide	Pgp, MRP1, MRP2, MRP3	1.03 + 0.11	10.12 + 0.71 *
irinotecan	Pgp, MRP1, MRP2	6.11 + 0.52	38.23 + 7.81 *
cisplatin	MRP1, MRP2, MRP4	11.24 + 1.85	44.67 + 5.84 *
oxaliplatin	MRP1, MRP4	6.12 + 0.79	19.92 + 1.23 *
5-fluorouracile	MRP1, MRP3, MRP4, MRP5	6.72 + 0.091	17.12 + 0.56 *
methotrexate	Pgp, MRP1, MRP2, MRP3, MRP4, BCRP	2.55 + 0.41	9.18 + 1.03 *
pemetrexed	MRP5	0.82 + 0.12	8.77 + 0.34 *
gemcitabine	MRP5	0.13 + 0.6	0.81 + 0.12 *
mitoxantrone	Pgp, MRP1, BCRP	5.13 + 0.27	10.23 + 0.37 *
thapsigargin	-	16.21 + 2.14	49.26 + 11.24 *
tunicamycin	-	1.86 + 0.12	5.04 + 0.19 *
brefeldin A	-	1.25 + 0.36	52.85 + 9.88 *
