# Supplementary material for: PERK induces resistance to cell death elicited by endoplasmic reticulum stress and chemotherapy
Source: Mol Cancer. 2017 May 12;16:91. doi: 10.1186/s12943-017-0657-0 (PMC5427528; doi:10.1186/s12943-017-0657-0)
Supplement: Supplementary file 2 — Primers used in qRT-PCR experiments. (XLSX 12 kb) [file 12943_2017_657_MOESM2_ESM.xlsx]

## Sheet: Foglio1
Gene	Forward primer (5’-> 3’)	Reverse primer (5’-> 3’)
GRP78	GGTGCAGCAGGACATCAAGTT	CCCACCTCCAATATCAACTTGA
PERK	TCTTGGTCCCACTGGAAGAG	AAAGCAGTGGGATTTGGATG
EIF2S1	TACTTTTTCTCCATTGCCCC	GGTGAATGGACCACCACATT
ATF4	GAAGGTCATCTGGCATGGTT	AGTCCCTCCAACAACAGCAA
GADD34	TTTTGGCAACCAGAACCG	GGAGATAGAAGTTGTGGGCG
NRF2	TCTTGCCTCCAAAGTATGTCAA	ACACGGTCCACAGCTCATC
GSR	ACCCTCACAACTTGGAAAGC	ACAAGCTGGGTGGCACTT
G6PD	AGGTGTTTTCGGGCAGAAG	GCCTTCCATCAGTCGGATAC
TXRND1	TCAGGGCCGTTCATTTTTAG	GATCTGCCCGTTGTGTTTG
SOD1	ACTGGTGGTCCATGAAAAAGC	AACGACTTCCAGCGTTTCCT
HMOX1	CTCAAACCTCCAAAAGCC	TCAAAAACCACCCCAACCC
NQO1	CTCGCCTCATGCGTTTTTG	CCCCTAATCTGACCTCGTTCAT
STIP1	GCAGCTACGAAACAAGCCTTCT	GACGCTGAGAGTGGTCATGATC
NFKB	GAAGGAATCGTACCGGGAACA	CTCAGAGGGCCTTGTGACAGTAA
MAPK1	TCTGGCAGGCAGGCAGGCAAT	TGACCGGGAGGAGGAAGGAAGA
GSK3β	GGAACTCCAACAAGGGAGCA	TTCGGGGTCGGAAGACCTTA
JNK1	TGGACTTGGAGGAGAGAACC	ACGATGATGATGGATGCTGA
PI3KCD	AATGAAACCCCTGTGGATCA	TCTGCAGAGTCAGCATG
PRKCA	GCGTCTCAGGACGTGGCCAAC	TTTCCCAAACCCCCAGATGAAGTCG
MRP1	TCCACCAGAAGGTGATCCTC	GTTTCTCAGATCGCTCACCC
S14	CGAGGCTGATGACCTGTTCT	GCCCTCTCCCACTCTCTCTT
