# Supplementary material for: PERK induces resistance to cell death elicited by endoplasmic reticulum stress and chemotherapy
Source: Mol Cancer. 2017 May 12;16:91. doi: 10.1186/s12943-017-0657-0 (PMC5427528; doi:10.1186/s12943-017-0657-0)
Supplement: Supplementary file 10 — Correlation between PERK or NRF2 expression and patient clinical outcome in different tumors. Patient overall survival was calculated by Cox's proportional hazard model and Kaplan-Meier method using the GSEA software. Z score: correlation score between gene expression and survival. FDR: false discovery rate. ACC: adrenocortical carcinoma; BRCA: breast invasive carcinoma; BLCA: bladder urothelial carcinoma; CESC: cervical squamous cell carcinoma and endocervical adenocarcinoma; CHOL: cholangiocarcinoma; COAD: colon adenocarcinoma; COADREAD: colorectal adenocarcinoma; DLBC: diffuse large B-cell lymphoma; GBM: glioblastoma multiforme; HNSC: head and neck squamous cell carcinoma; KICH: chromophobe renal cell carcinoma; KIRC: kidney renal clear cell carcinoma; KIRP: kidney renal papillary cell carcinoma; LGG: lower grade glioma; LIHC: liver hepatocellular carcinoma; LUAD: lung adenocarcinoma; LUSC: lung squamous cell carcinoma; MESO: mesothelioma; OV: ovarian serous cystadenocarcinoma; PAAD: pancreatic adenocarcinoma; PCPG: pheochromocytoma and paraganglioma; PRAD: prostate adenocarcinoma; READ: rectum adenocarcinoma; SARC: sarcoma; SKCM: skin cutaneous melanoma; TGCT: testicular germ cell tumor; THCA: thyroid carcinoma; THYM: thymoma; UCEC: uterine corpus endometrial carcinoma; UCS: uterine carcinosacoma; UVM: uveal melanoma. Significant p values are in bold characters. (XLSX 17 kb) [file 12943_2017_657_MOESM10_ESM.xlsx]

## Sheet: Foglio1
PERK	Cox analysis				Kaplan Maier analysis
Cancer	Z score	P value	FDR	Bonf	Z score	P value	FDR	Bonf
ACC	0.278136	0.780908	0.911764	1	0.01913	0.984737	0.984737	1
BRCA	2.8287	0.004674	0.074779	0.149558	2.46202	0.013816	0.360671	0.442099
BLCA	-2.2441	0.024826	0.160596	0.794441	-1.92356	0.054409	0.435275	1
CESC	0.105952	0.915621	0.971575	1	0.029184	0.976718	0.984737	1
CHOL	-0.53546	0.592333	0.83065	1	-1.02126	0.307133	0.702018	1
COAD	-1.38881	0.164891	0.376893	1	-0.67457	0.49995	0.764201	1
COADREAD	-2.10685	0.03513	0.160596	1	-1.65306	0.098319	0.629239	1
DLBC	0.488855	0.624944	0.833259	1	0.831673	0.405593	0.764201	1
GBM	-1.62135	0.104942	0.305285	1	-2.07034	0.03842	0.409816	1
HNSC	-1.01405	0.310558	0.621117	1	-0.63506	0.525388	0.764201	1
KICH	-1.53448	0.124913	0.308976	1	-1.14547	0.252016	0.686005	1
KIRC	-0.21947	0.826286	0.911764	1	0.652533	0.514058	0.764201	1
KIRP	1.76003	0.078402	0.250886	1	1.08327	0.278689	0.686005	1
LGG	4.64956	3.33e-06	0.000106	0.000106	2.28111	0.022542	0.360671	0.721343
LIHC	-0.04139	0.966984	0.971575	1	-0.17992	0.857215	0.945893	1
LUAD	-2.41796	0.015608	0.160596	0.499454	-0.75502	0.450235	0.764201	1
LUSC	-0.831	0.405971	0.721726	1	-0.42283	0.672421	0.807565	1
MESO	-0.52887	0.596897	0.83065	1	1.35034	0.176907	0.686005	1
OV	0.590941	0.55456	0.83065	1	1.08776	0.276702	0.686005	1
PAAD	0.528677	0.59703	0.83065	1	0.410577	0.681383	0.807565	1
PCPG	0.881311	0.378149	0.711811	1	0.101699	0.918996	0.980262	1
PRAD	1.11583	0.264496	0.564257	1	0.715212	0.474478	0.764201	1
READ	-1.78093	0.074923	0.250886	1	-1.27514	0.202261	0.686005	1
SARC	0.310916	0.755865	0.911764	1	0.686124	0.492635	0.764201	1
SKCM	0.035633	0.971575	0.971575	1	0.541657	0.588055	0.784073	1
TGCT	0.246933	0.80496	0.911764	1	0.572365	0.567074	0.784073	1
THCA	1.53201	0.125521	0.308976	1	1.13636	0.255806	0.686005	1
THYM	-2.16833	0.030133	0.160596	0.964268	-1.12468	0.260725	0.686005	1
UCEC	0.301223	0.763244	0.911764	1	0.469835	0.638473	0.807565	1
UCS	-0.63087	0.528128	0.83065	1	-0.24051	0.809931	0.925636	1
UVM	1.98164	0.04752	0.190079	1	1.4125	0.157803	0.686005	1
NRF2	Cox analysis				Kaplan Maier analysis
Cancer	Z score	P value	FDR	Bonf	Z score	P value	FDR	Bonf
ACC	0.786322	0.431679	0.790614	1	-0.2401	0.81025	0.918393	1
BRCA	0.038224	0.969509	0.969509	1	-0.17511	0.860994	0.918393	1
BLCA	-2.01463	0.043944	0.234368	1	-1.81675	0.069255	0.369358	1
CESC	-0.80695	0.419698	0.790614	1	-0.96133	0.336386	0.740407	1
CHOL	-0.70512	0.480739	0.809665	1	-0.44288	0.657853	0.915274	1
COAD	1.1524	0.249157	0.790614	1	2.38444	0.017105	0.136839	0.547356
COADREAD	0.620265	0.535084	0.843862	1	0.622063	0.5339	0.839955	1
DLBC	0.057778	0.953926	0.969509	1	0.21419	0.830399	0.918393	1
GBM	0.451882	0.651354	0.843862	1	0.315005	0.752758	0.918393	1
HNSC	0.423316	0.672065	0.843862	1	-0.57378	0.566113	0.839955	1
KICH	-2.61786	0.008848	0.093788	0.283149	-1.40917	0.158785	0.63514	1
KIRC	-1.88988	0.058774	0.268683	1	-2.38934	0.016879	0.136839	0.540116
KIRP	0.846569	0.397236	0.790614	1	0.940296	0.347066	0.740407	1
LGG	5.1819	2.2e-07	7.03e-06	7.03e-06	4.18154	2.9e-05	0.000927	0.000927
LIHC	0.900663	0.367767	0.790614	1	-0.03833	0.969427	0.969427	1
LUAD	0.334	0.73838	0.843862	1	-0.09992	0.920408	0.950099	1
LUSC	-0.99231	0.321049	0.790614	1	-1.84481	0.065066	0.369358	1
MESO	-3.13421	0.001723	0.027571	0.055142	-3.3028	0.000957	0.015316	0.030632
OV	-0.5351	0.592582	0.843862	1	-0.55709	0.577469	0.839955	1
PAAD	2.52036	0.011723	0.093788	0.37515	-0.19116	0.848399	0.918393	1
PCPG	0.916985	0.359151	0.790614	1	0.702402	0.482428	0.839955	1
PRAD	0.461007	0.644794	0.843862	1	-0.89152	0.372648	0.745296	1
READ	-0.82841	0.407438	0.790614	1	-1.44047	0.149735	0.63514	1
SARC	-2.41358	0.015797	0.101099	0.505493	-1.10572	0.268849	0.716931	1
SKCM	0.764247	0.44472	0.790614	1	1.31956	0.186984	0.664831	1
TGCT	0.358824	0.719727	0.843862	1	0.597067	0.550463	0.839955	1
THCA	0.336925	0.736174	0.843862	1	-0.18525	0.85303	0.918393	1
THYM	0.171054	0.864181	0.921794	1	0.258771	0.795812	0.918393	1
UCEC	0.491171	0.623305	0.843862	1	1.1272	0.259657	0.716931	1
UCS	1.66759	0.095397	0.339189	1	0.953783	0.340194	0.740407	1
UVM	1.7572	0.078884	0.315536	1	1.22559	0.220353	0.705129	1
